## RESEARCH ARTICLE

# Cold acclimation induces life stage-specific responses in the cardiac proteome of western painted turtles (*Chrysemys picta bellii*): implications for anoxia tolerance

Sarah L. Alderman<sup>1,\*</sup>, Claire L. Riggs<sup>2,3</sup>, Oliver M. N. Bullingham<sup>1</sup>, Todd E. Gillis<sup>1</sup> and Daniel E. Warren<sup>2,\*</sup>

## ABSTRACT

Western painted turtles (*Chrysemys picta bellii*) are the most anoxia-tolerant tetrapod. Survival time improves at low temperature and during ontogeny, such that adults acclimated to 3°C survive far longer without oxygen than either warm-acclimated adults or cold-acclimated hatchlings. As protein synthesis is rapidly suppressed to save energy at the onset of anoxia exposure, this study tested the hypothesis that cold acclimation would evoke preparatory changes in protein expression to support enhanced anoxia survival in adult but not hatchling turtles. To test this, adult and hatchling turtles were acclimated to either 20°C (warm) or 3°C (cold) for 5 weeks, and then the heart ventricles were collected for quantitative proteomic analysis. The relative abundance of 1316 identified proteins was compared between temperatures and developmental stages. The effect of cold acclimation on the cardiac proteome was only evident in the context of an interaction with life stage, suggesting that ontogenic differences in anoxia tolerance may be predicated on successful maturation of the heart. The main differences between the hatchling and adult cardiac proteomes reflect an increase in metabolic scope with age that included more myoglobin and increased investment in both aerobic and anaerobic energy pathways. Mitochondrial structure and function were key targets of the life stage- and temperature-induced changes to the cardiac proteome, including reduced Complex II proteins in cold-acclimated adults that may help down-regulate the electron transport system and avoid succinate accumulation during anoxia. Therefore, targeted cold-induced changes to the cardiac proteome may be a contributing mechanism for stage-specific anoxia tolerance in turtles.

**KEY WORDS:** Temperature, Heart, Hatchling, Development, Ectotherm, iTRAQ, Protein expression

## INTRODUCTION

For most vertebrates, the inability to sustain adequate ATP supply in the absence of oxygen (anoxia) can quickly trigger cell death, and any cells that survive anoxia face the added challenge of mitigating tissue damage related to excess production of reactive oxygen species (ROS) when oxygen returns. These events are particularly devastating to vital organs with high metabolic demands, such as the

heart. Painted turtles (*Chrysemys picta*) are champions among vertebrates in their capacity to live without oxygen (Jackson, 2002), surviving months at the bottom of ice-covered, anoxic ponds and lakes during their winter dormancy (Jackson and Ultsch, 2010). The ability to survive prolonged periods of anoxia whilst maintaining life-sustaining cardiac function presents a fascinating comparative model for studying the cellular mechanisms of anoxia tolerance and perhaps for identifying novel strategies to preserve cardiac integrity in the event of ischaemia reperfusion.

Painted turtles are well adapted for anaerobic metabolism and integrate a variety of cellular, physiological and behavioural responses to balance and prioritize energy needs, manage metabolic waste and defend vital processes when oxygen is limited, including a profound hypometabolism and bradycardia, large hepatic glycogen stores, and high lactate buffering capacity afforded by the blood and shell (Bickler and Buck, 2007; Hochachka et al., 1996; Jackson, 1968, 2000; Jackson and Schmidt-Nielsen, 1966; Overgaard et al., 2007; Stecyk et al., 2008; Storey, 2004). In many tissues, reducing ATP demand is supported to a large extent by a decrease in the energetically expensive process of protein turnover (Bailey and Driedzic, 1996; Land and Hochachka, 1994; Land et al., 1993) facilitated by translational suppression (Fraser et al., 2001; Keenan et al., 2015). In cardiac tissue, however, mechanical work consumes most of the cellular energy, and so reducing heart rate to a minimal level is critical to economizing ATP (Stecyk et al., 2008). Nevertheless, translational arrest does occur in anoxic cardiac tissue (Bailey and Driedzic, 1996), which may be facilitated by a ubiquitous down-regulation of ribosomal protein genes (Fanter et al., 2020). Mitochondrial remodelling also plays a key role in managing metabolic depression (Bundgaard et al., 2020; St-Pierre et al., 2000; Stuart et al., 1998). For example, mitochondrial respiration rates are reduced in the brain and heart of cold-acclimated turtles without altering mitochondrial content or structure (Bundgaard et al., 2019; Pamerter et al., 2016). Rather, suppressing mitochondrial activity may be achieved by a non-specific decrease in substrate utilization across the electron transport system (ETS) (Bundgaard et al., 2019), or via targeted reductions in proton leak and ATP synthase activity (Galli et al., 2013). The capacity for turtles to evoke these responses is influenced by environmental temperature, such that cold acclimation prior to anoxia exposure substantially decreases the onset of the metabolic insult and increases the survival time (Herbert and Jackson, 1985a,b; Warren and Jackson, 2007).

Unlike adult painted turtles, hatchlings do not overwinter underwater but rather remain in their terrestrial nests. This overwintering strategy certainly comes with its own challenges (e.g. subzero temperatures), but environmental anoxia is not one of them. Hatchlings are able to withstand anoxic bouts, but survival time is far less than in adults (40 days and 170 days at 3°C for

<sup>1</sup>Department of Integrative Biology, University of Guelph, ON, Canada, N1G 2W1.

<sup>2</sup>Department of Biology, Saint Louis University, St Louis, MO 63103, USA. <sup>3</sup>Division of Rheumatology, Inflammation, and Immunity, Brigham and Women's Hospital, Harvard Medical School, Boston, MA 02115, USA.

\*Authors for correspondence (alderman@uoguelph.ca, daniel.warren@slu.edu)

© S.L.A., 0000-0002-8896-9777; C.L.R., 0000-0002-5166-9172; T.E.G., 0000-0002-8585-0658; D.E.W., 0000-0002-9043-7411

hatchlings and adults, respectively; Odegard et al., 2018; Reese et al., 2004). This contrasts with the mammalian paradigm of an age-related decline in anoxia tolerance (Adolph, 1969). Although a smaller mass of mineralized tissue indicates a lower whole-body buffering capacity (Reese et al., 2004), a higher rate of lactate accumulation in the blood of hatchlings also indicates a reduced capacity to suppress metabolism. Recent work highlights that the transcriptional responses of the heart to anoxia exposure (Fanter et al., 2020) and cold acclimation (Fanter et al., 2017) are life stage specific, suggesting that ontogenic differences, as well as cold acclimation, may account for the profound anoxia tolerance of adult painted turtles. Few studies have incorporated life stage comparisons into their experimental designs.

To the best of our knowledge, only three studies have endeavoured to use proteomics as a tool for understanding the cellular mechanisms of anoxia tolerance in comparative models. Anoxia-induced changes to protein expression were explored in the brains of painted turtles (Smith et al., 2015) and crucian carp (*Carassius carassius*; Smith et al., 2009), another anoxia-tolerant model species, using two-dimensional difference gel electrophoresis (2D DIGE). Gomez and Richards (2018) determined proteome differences in anoxia-exposed isolated heart mitochondria from *T. scripta*, using a mass spectrometric approach (Gomez and Richards, 2018). Missing from these studies is the contribution of cold acclimation to the anoxia-tolerant proteome – a notable limitation given that protein synthesis is rapidly suppressed upon anoxia exposure to facilitate metabolic depression (Bailey and Driedzic, 1996; Fraser et al., 2001; Land and Hochachka, 1994; Land et al., 1993), and thus any protein abundance changes necessary for surviving prolonged periods without oxygen should occur prior to the onset of anoxia. Therefore, we tested the hypothesis that cold acclimation prepares the heart for anoxia exposure by altering cardiac protein expression of adult painted turtles to generate an anoxia-tolerant cardiac phenotype, and that these preparatory changes are blunted or absent in hatchlings. Heart tissue was chosen because cardiac function is necessarily sustained, albeit reduced, in both life stages irrespective of overwintering strategy and oxygen availability.

## MATERIALS AND METHODS

### Animal procurement and husbandry

Adult male western painted turtles *Chrysemys picta bellii* (Gray 1830) ( $N=7$ , mean $\pm$ s.e.m. mass 166.2 $\pm$ 7.6 g, range 141.7–193.1 g) were purchased from Niles Biological, Inc. (Sacramento, CA, USA) and acclimated for 50 days in large, flow-through fibreglass tanks containing dechlorinated St Louis municipal water (pH 7–8.5, 13–20°C), with access to deep water and a basking platform bathed in 10 W UV fluorescent light (Zoomed Reptisun 10.0) and 60 W incandescent light maintained on a weekly updated natural photoperiod. Air temperature was 20–24°C. Adult turtles were fed commercial turtle pellets (Mazuri® Aquatic Turtle Diet) *ad libitum* 5 times per week.

Painted turtle eggs were collected in June from multiple nest sites located in Rice Creek Chain of Lakes Park (Anoka County, MN, USA; MDNR Special Permit 23851). Clutches were transferred to containers with moistened grade-3 vermiculite (1.12 g sterile deionized water per g vermiculite) and incubated at 25°C in a field incubator for 3–7 days (to produce all males). Eggs were then incubated at 25°C and ~95% humidity until hatching (8–9 weeks), after which hatchlings were single-housed at 20°C in black plastic containers with a moistened gauze pad until used in experiments in November. All housing and animal procedures were approved by Saint Louis University (Protocol 2198).

### Experimental design and turtle sampling

The experimental set-up, temperature acclimation and sampling were carried out as previously described (Fanter et al., 2020) in a 170 l glass aquarium within which a 10.5 l acrylic aquarium with plastic grating floor and walls was glued to the inside wall. This allowed hatchling and adult turtles to be physically isolated whilst sharing environmental conditions. The tank was partially filled with dechlorinated, aerated, St Louis municipal water, partially refreshed every 10 days, and no basking platform was provided. A winter photoperiod (9 h:15 h light:dark) was maintained with a 60 W incandescent bulb over the tank. Water temperature was controlled with a proportional temperature controller (YSI model 72) and immersion water heater. The system was housed within a walk-in cold room that was always 1°C colder than the set temperature of the YSI controller. Food was withheld because turtles do not eat when their body temperatures are below 15°C.

In November, hatchling turtles ( $N=8$ , mean $\pm$ s.e.m. mass 4.8 $\pm$ 0.3 g, range 3.8–5.6 g) were transferred from their individual containers in the laboratory incubator to the acclimation aquarium containing 20°C water. Adult turtles (number and mass as above) were placed in the outer tank 10 days later. Water level was always maintained to yield a ratio of 51.8 g of turtle per 1 litre of water. All turtles were then held at 20°C for four more days before sampling a subset as described below ( $n=3$  adults,  $n=4$  hatchlings). For the remaining turtles, water temperature was gradually cooled at a rate of 2°C day<sup>-1</sup> to 10°C and then by 1°C day<sup>-1</sup> to 3°C. Turtles were then maintained at 3°C for an additional 5 weeks prior to sampling. There were no significant differences in body mass between the two temperature groups (20°C and 3°C) for each developmental stage (adults:  $N=7$ , unpaired *t*-test,  $P=0.68$ ; hatchlings:  $N=8$ , unpaired *t*-test,  $P=0.62$ ). To eliminate potential clutch effects, hatchlings were distributed between the two acclimation temperatures (20°C and 3°C) so that all turtles within a treatment group were from unique clutches.

### Tissue sampling

Turtles were sampled at 20°C and 3°C as previously described (Fanter et al., 2020). At each temperature, the turtles were removed from the water and quickly decapitated, after which the plastrons were removed with scissors (hatchlings) or a bone saw (adults). The heart ventricle was then removed, blotted to remove excess blood, trisected (adults only), and then freeze-clamped in liquid nitrogen. Ventricle were stored at –80°C until shipping overnight on dry ice to the University of Guelph for proteomics analysis.

### Protein extraction and iTRAQ labelling

A total of 15 frozen ventricles were used to characterize and quantify the cardiac proteome of turtles at two developmental stages (hatchling, H; adult, A) and two acclimation temperatures (warm acclimated, W; cold acclimated, C) for a factorial sample distribution ( $n=4$  each for HW and HC;  $n=4$  AC;  $n=3$  AW). Frozen hearts were homogenized in 150–450  $\mu$ l ice-cold RIPA buffer (150 mmol l<sup>-1</sup> NaCl, 50 mmol l<sup>-1</sup> Tris, 100 mmol l<sup>-1</sup> DTT, 1% Triton X-100, 0.5% sodium deoxycholate, 0.1% SDS, pH 8) containing a cocktail of protease inhibitors (Promega Corporation, Madison, WI, USA) using a Precellys24 and 2 mm zirconium oxide beads (2 $\times$ 25 s at 6800 rpm; Bertin Instruments, Montigny-le Bretonneux, France). To facilitate dissociation of membrane proteins, the crude homogenate was incubated on ice for 30 min with periodic mixing and a brief sonication (3 $\times$ 2 s) halfway through the incubation, then clarified by centrifugation (13,000  $g \times$  5 min at 4°C). An aliquot of the supernatant was used to confirm extraction efficacy using standard SDS-PAGE and Coomassie stain.

The remaining supernatant was precipitated using the Calbiochem Protein Extraction Kit (EMD Millipore, Billerica, MA, USA) according to the manufacturer's instructions, and reconstituted in 20–50  $\mu\text{l}$  buffer (1 mol  $\text{l}^{-1}$  HEPES, 8 mol  $\text{l}^{-1}$  urea, 2 mol  $\text{l}^{-1}$  thiourea, 4% w/v CHAPS, pH 8.5). For each sample, 150  $\mu\text{g}$  total protein was transferred to an Amicon Ultra-0.5 Centrifugal Filter Unit (10 kDa nominal molecular weight cut-off) for buffer exchange, cysteine blocking (8 mol  $\text{l}^{-1}$  urea, 0.1 mol  $\text{l}^{-1}$  HEPES, 0.5 mol  $\text{l}^{-1}$  iodoacetamide, pH 8.5; 20 min in dark) and overnight protein digestion using 4  $\mu\text{g}$  MS-grade trypsin (Promega) at 37°C, all as previously described (Alderman et al., 2019; Dindia et al., 2017). Digested peptides were recovered and labelled using two

8-plex iTRAQ kits (SCIEX, Framingham, MA, USA) according to manufacturer's instructions, ensuring that mass tags were uniformly distributed across treatment groups, and that all treatment groups were present on each plex. One sample (AW) was labelled in replicate reactions to serve as an internal control on the 2 plexes. Labelled peptides were pooled and purified using C18 columns (Sigma) and eluted with 70% acetonitrile containing 0.1% formic acid.

#### Separation of peptides and LC mass spectrometric analysis

Analysis of iTRAQ-labelled peptides by mass spectrometry was performed at SPARC BioCenter Molecular Analysis (The Hospital

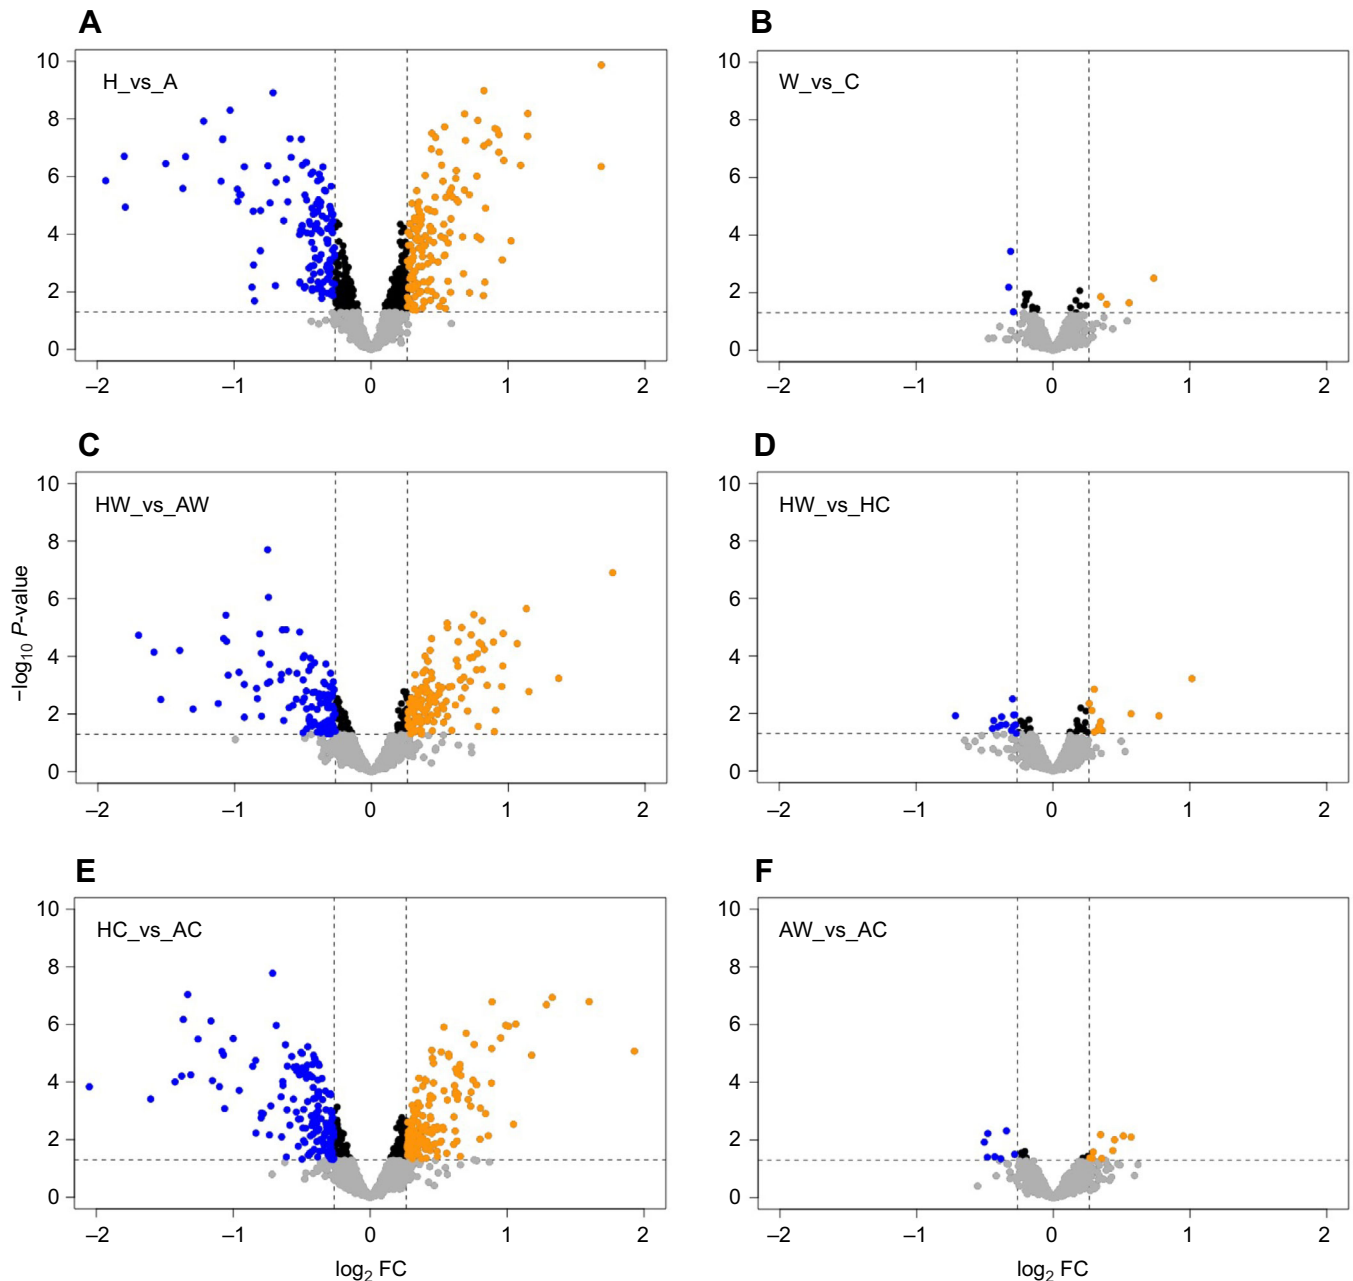

**Fig. 1. Volcano plots of protein abundance changes across experimental conditions.** Data are expressed as the inverse log of the  $P$ -value versus  $\log_2$  fold-change (FC). Significant effects were considered for any protein with absolute FC > 1.2 and  $P < 0.05$  and are indicated in blue (down-regulated) or yellow (up-regulated). Comparisons used in the analysis included main effects of (A) age and (B) temperature, as well as interaction effects (stage  $\times$  temperature; temperature  $\times$  stage) including (C) stage effects in warm-acclimated turtles, (D) temperature effects in hatchlings, (E) stage effects in cold-acclimated turtles, and (F) temperature effects in adult turtles. A, adult; C, cold; H, hatchling; W, warm.

for Sick Children, Toronto, ON, Canada) using an Orbitrap Fusion Lumos (Thermo Scientific), with specifications detailed in Supplementary Materials and Methods 1. Identification and quantification of cardiac proteins was performed using PEAKS Studio (Bioinformatics Solutions Inc., Waterloo, ON, Canada) by searching mass spectra against the protein database for *Chrysemys picta bellii* [txID:8479] in NCBI (7 February 2020) using the following spectrum file search settings: 20 ppm precursor mass tolerance, 0.5 Da fragment mass tolerance, carbamidomethylation and iTRAQ static modifications, at least two unique identifying peptides, and target false discovery rate (FDR) 5%. Protein abundance was normalized to total protein in each run. Data are available from ProteomeXchange PXD023534.

### Data processing and bioinformatics

Data processing and analysis were performed in RStudio. The full list of retrieved protein identifications was collated to remove replicated entries, proteins not present on both plexes, and proteins identified by single unique peptides. Abundance values for each plex were then normalized using a variance stabilization function (vsN). Data from the two plexes were combined and abundance values scaled to the internal control sample. Differentially abundant (DA) proteins were identified using the Differential Enrichment analysis of Proteomics data package in R (DEP 1.10.0), accounting for the influence of the main effects of life stage (H, A) and temperature (W, C), as well as their interaction (stage $\times$ temperature: HW\_vs\_AW and HC\_vs\_AC; temperature $\times$ stage: HW\_vs\_HC and AW\_vs\_AC). DA proteins were defined using fold-change and significance thresholds. A fold-change cut-off of 1.2 was chosen

because of the tendency for iTRAQ to underestimate fold-change and bias the null hypothesis (Mahoney et al., 2011; Saw et al., 2009). Because of the small number of significant proteins identified following multiple testing corrections ( $q < 0.05$ ), histograms of raw  $P$ -values were constructed and used to determine whether the corrected threshold was too strict for detecting true positives with small effects (Pascovici et al., 2016). A raw  $P$ -value significance threshold ( $P < 0.05$ ) was chosen only when a clear left-skew was visible in the histogram (Fig. S1). This approach increases the potential of capturing biologically relevant information from a dataset characterized by subtle changes across many observations.

Pathway analyses were performed by uploading the DA protein lists into STRING (<https://string-db.org>; 20 July 2020), which computes functional enrichments in gene ontology (GO) using a measure of strength ( $\log_{10}$  observed/expected) and a Benjamini–Hochberg-corrected  $P$ -value. Enriched GO terms were visualized with GPlot (Walter et al., 2015) using a calculated  $z$ -score as a measure of term enrichment that accounts for the proportion of the GO term represented by DA proteins in the dataset (where  $z\text{-score} = \text{observed}/\sqrt{\text{background}}$ , with a negative integer for down-regulated terms).

## RESULTS

### Characterization of the turtle cardiac proteome

A total of 1844 and 1865 non-redundant protein identifications were generated from the two iTRAQ 8-plexes, respectively, with 1503 proteins common to both plexes. An additional 182 proteins were removed because they were identified by a single unique

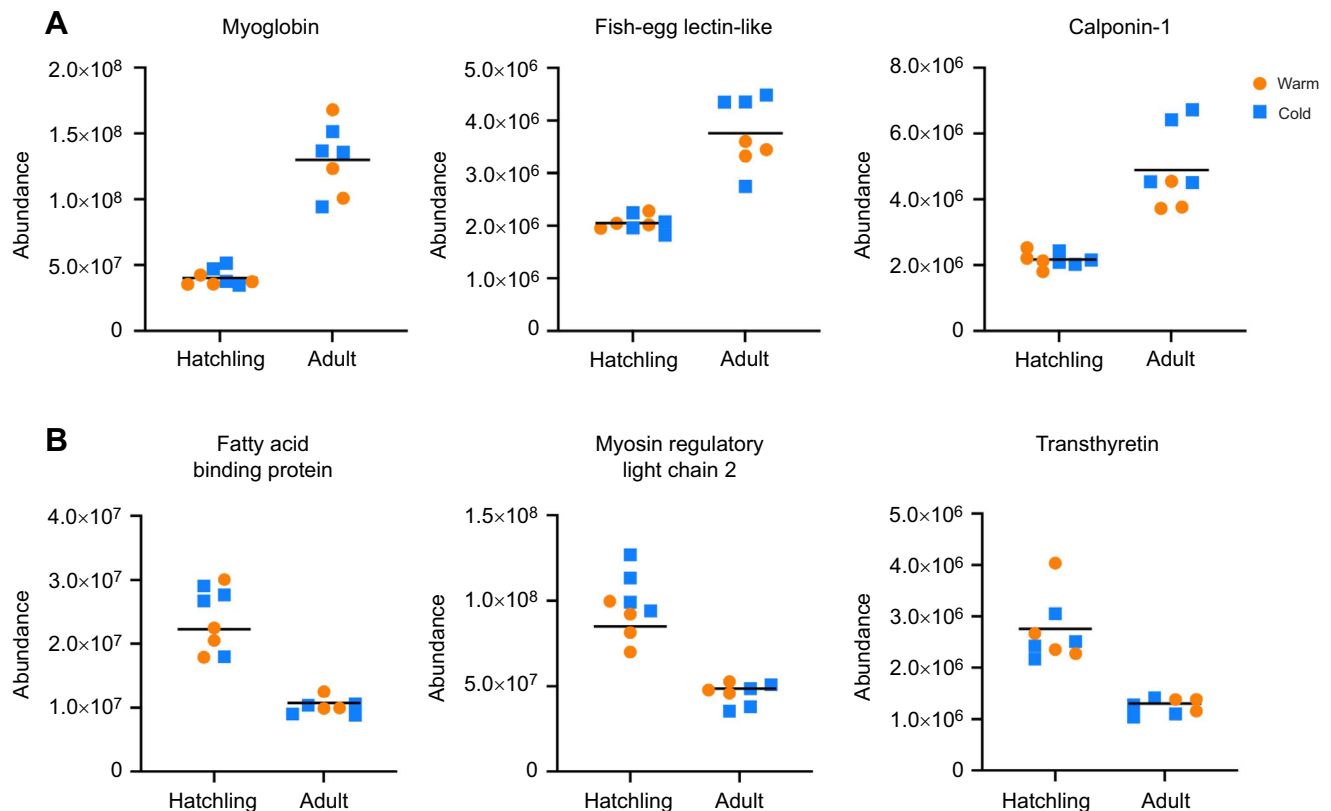

**Fig. 2. Summary of top differentially abundant proteins for the main effect of stage (hatchling versus adult).** (A) Top three up-regulated proteins. (B) Top three down-regulated proteins. Data for individual turtles are plotted with acclimation temperature indicated as orange circles (warm) or blue squares (cold). The line is the geometric mean for stage (hatchling  $n=8$ ; adult  $n=7$ ).



peptide, and 5 proteins were removed that displayed oppositional abundance values for the internal control sample quantified on both plexes. Therefore, the cardiac proteome of the western painted turtle was described by 1316 high-quality, non-redundant proteins with abundance values covering 8 orders of magnitude (Table S1). The top 50 most abundant proteins in the cardiac proteome, irrespective of life stage or acclimation temperature, included proteins involved in energy metabolism (e.g. ATP synthases, creatine kinase), striated muscle contraction (e.g. myosin-binding protein C, troponin C), structural integrity (e.g. desmin, spectrin alpha chain), as well as storage and transport (e.g. myoglobin, apolipoprotein B-100).

Steady-state protein expression in the turtle heart was influenced by one or more experimental treatments (absolute fold-change >1.2, raw  $P < 0.05$ ). In general, protein expression was influenced more strongly by developmental stage (Fig. 1A) than by temperature (Fig. 1B), and this was also true for interaction effects, whereby the age response within each acclimation temperature (stage  $\times$  temperature; Fig. 1C,E) was substantially greater than the temperature response within either age class (temperature  $\times$  stage; Fig. 1D,F). Given the uniformity of  $P$ -values in the temperature comparisons (W\_vs\_C; AW\_vs\_AC; HW\_vs\_HC; Fig. S1), the risk of false discovery in these small lists of DA proteins precluded further analysis

(Pascovici et al., 2016). Therefore, only DA proteins identified for the main effect of stage (H\_vs\_A) and its interaction with temperature (HW\_vs\_AW; HC\_vs\_AC) were considered further.

### Effect of developmental stage on the cardiac proteome

The cardiac proteome of painted turtles changed substantially as the animals matured from hatchlings to adults. A total of 285 proteins were significantly altered by the main effect stage, including myoglobin, fish-egg lectin-like and calponin-1 as the top three up-regulated proteins (highest fold-change; Fig. 2A), and fatty acid-binding protein adipocyte, myosin regulatory light chain 2 atrial isoform, and transthyretin as the top three down-regulated proteins (Fig. 2B). Most DA proteins for the main effect of developmental stage, however, were also significant for a stage  $\times$  temperature interaction effect (Table S2), for a combined response of 390 DA proteins. The influence of temperature on the maturation of the cardiac proteome was more substantial in cold-acclimated turtles. Specifically, while ~20% of the total stage  $\times$  temperature DA proteins were unique to the HW\_vs\_AW comparison, the effect of developmental stage in the cold-acclimated turtles claimed up to 40% of the total DA proteins (Fig. 3, left). This included decreased abundance of three 40S ribosomal proteins (RPS6, RPS21, RPS28) in cold-acclimated adults relative to hatchlings, and increased

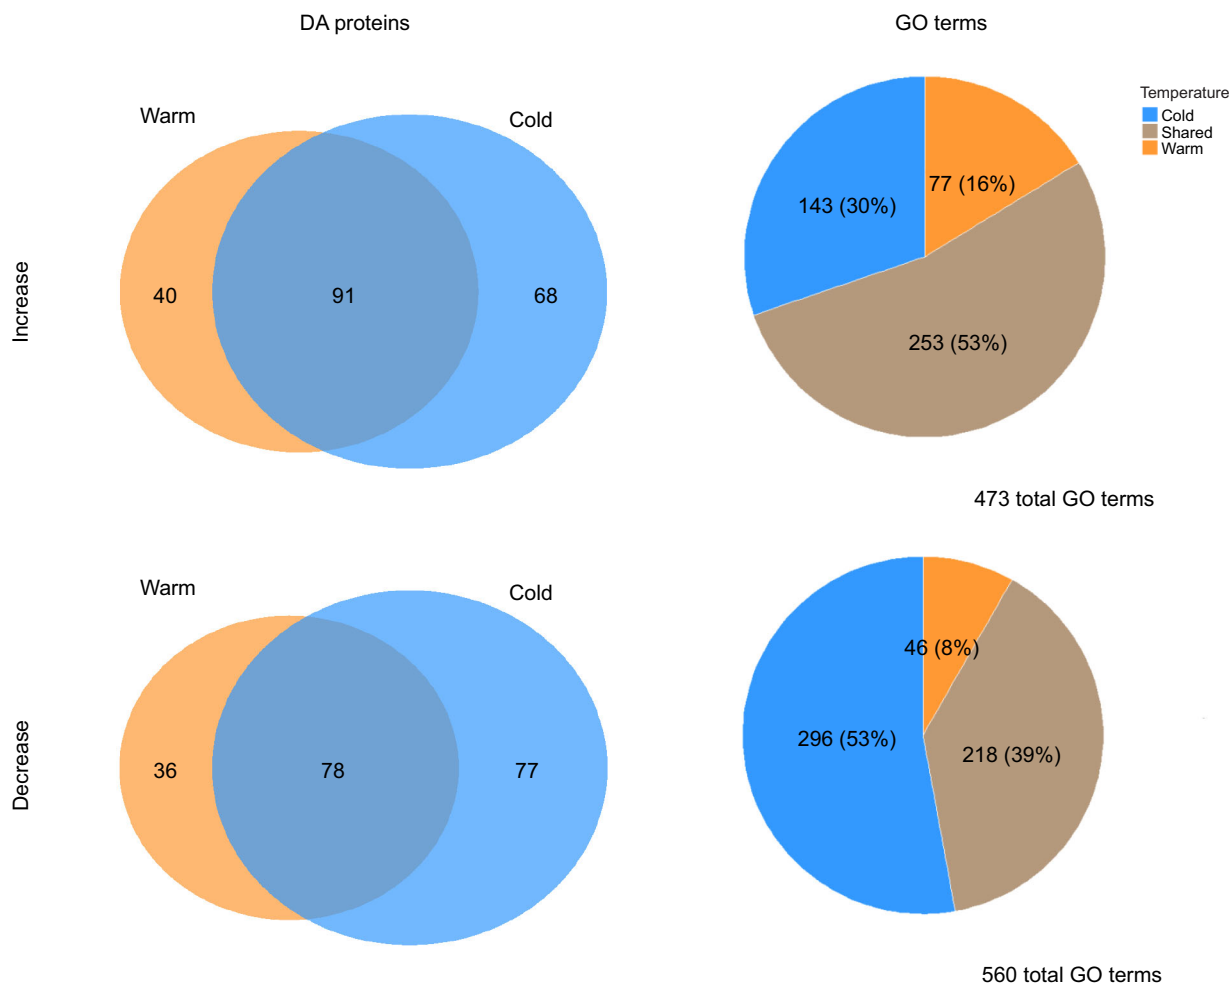

**Fig. 3. Summary of differentially abundant (DA) proteins and gene ontology (GO) terms.** Proportions of shared and unique DA proteins (left) and GO terms (right) for stage  $\times$  temperature interactions in the cardiac proteomes of warm-acclimated hatchlings versus warm-acclimated adults, and cold-acclimated hatchlings versus cold-acclimated adults. Significant effects are separated for those that increase with age (top) and decrease with age (bottom).

abundance of two 60S ribosomal proteins (RPL10A, RPL27) in cold-acclimated hatchlings relative to adults (Fig. 4).

Functional insight into the effect of developmental stage on the cardiac proteome was considered separately for each acclimation temperature by inputting the DA proteins for each stage $\times$ temperature interaction term separately into STRING, and the results were interpreted based on shared and unique GO term enrichment (FDR<0.05). Over 1000 GO terms were enriched by the stage $\times$ temperature DA proteins (Table S3), with a greater proportion of GO term enrichment occurring in the HC\_vs\_AC comparison, particularly for down-regulated DA proteins. As indicated in Fig. 3 (right), 39–53% of enriched GO terms were shared between warm- and cold-acclimated turtles, and the majority of the remaining enriched GO terms were unique to cold-acclimated turtles (30–53%). Visualizations of shared and unique GO terms for stage $\times$ temperature revealed that maturation of the cardiac proteome from hatchlings to adults involved a substantial investment in proteins related to mitochondrial form and function (Fig. 5). In warm-acclimated adult turtle hearts, enrichment of additional mitochondria-related GO terms occurred relative to warm-acclimated hatchlings, including the GO terms ‘cellular component’ for the succinate dehydrogenase (SDH) and ATP synthase complexes (Complex II and V, respectively), ‘molecular function’ associated with oxidoreductase and succinate dehydrogenase activity, and ‘biological process’ for NADH metabolic process (Fig. 6A). In cold-acclimated adult turtle hearts, the majority of GO terms enriched relative to cold hatchlings were categorized as biological process and included up-regulation of pathways involved in purine metabolism and biosynthesis as well as the respirasome (cellular component), and down-regulation of pathways involved in RNA processing and biogenesis of cell components (Fig. 6B). This differential pathway enrichment can be attributed to specific

adjustments in ETS Complex I–IV and ATP synthase (Complex V; Fig. 7A). For example, several subunits of Complex I [NADH dehydrogenase (ubiquinone) subcomplex, NDUF] were uniquely altered by stage and temperature (Fig. 7B), including a greater stage response in warm (i.e. NDUFA6) or cold (i.e. NDUFA12, NDUFB9), as well as oppositional responses (i.e. NDUFA5). For Complex II (SDH; Fig. 7C), Complex III (ubiquinol:cytochrome *c* reductase, UQCR; Fig. 7D) and Complex V (ATP synthase; Fig. 7F), a developmental stage-related increase in certain subunits occurred in warm- but not cold-acclimated turtle hearts. Finally, as with Complex I, subunits of Complex IV (cytochrome *c* oxidase) had a greater stage response in the warm-acclimated (i.e. NDUFA4, COX6B) and cold-acclimated (i.e. COX5A, COX5B) turtle hearts; however, here the difference was largely driven by a temperature-induced change in hatchlings rather than adults (Fig. 7E). Additional DA proteins contributing to the most significantly enriched GO terms in the cold stage $\times$ temperature comparison included enzymes involved in purine metabolism (i.e. GTP:AMP phosphotransferase, purine nucleoside phosphorylase) and energetic pathways (i.e. glyceraldehyde 3-phosphate dehydrogenase, phosphoglucumutase, ATP-citrate synthase) (Table S3).

## DISCUSSION

This study provides the first comprehensive and quantitative analysis of protein expression changes incurred by cold acclimation in the turtle heart, and offers novel, mechanistic hypotheses to explain the developmental stage-specific anoxia tolerance of these animals. A major finding of this work is that maturation of the turtle heart has a more substantial influence on cardiac protein expression than environmental temperature, which has several implications. First, the majority of generalized responses to cold acclimation so far described for the hearts of painted turtles

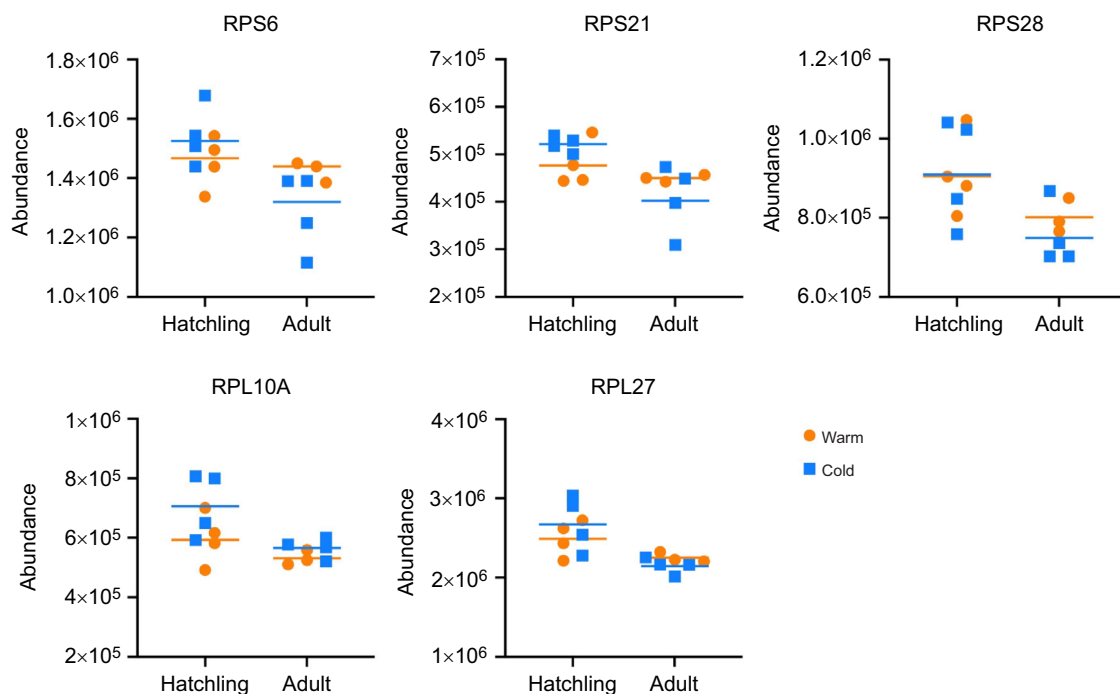

**Fig. 4. Differentially abundant ribosomal proteins with a significant stage $\times$ temperature interaction for cold-acclimated turtles.** Three 40S ribosomal proteins (RPS6, RPS21, RPS28) had lower abundance in cold-acclimated adult turtle hearts relative to hatchlings. Two 60S ribosomal proteins (RPL10A, RPL27) had greater abundance in cold-acclimated hatchling turtle hearts relative to adults. Data for individual turtles are plotted with acclimation temperature indicated as orange circles (warm) or blue squares (cold), with geometric mean marked with a coloured line for each stage $\times$ temperature variable. There were no significant differences in the abundance of any of these five proteins for warm-acclimated hatchlings and adults ( $n=4$ , except warm-acclimated adult  $n=3$ ).

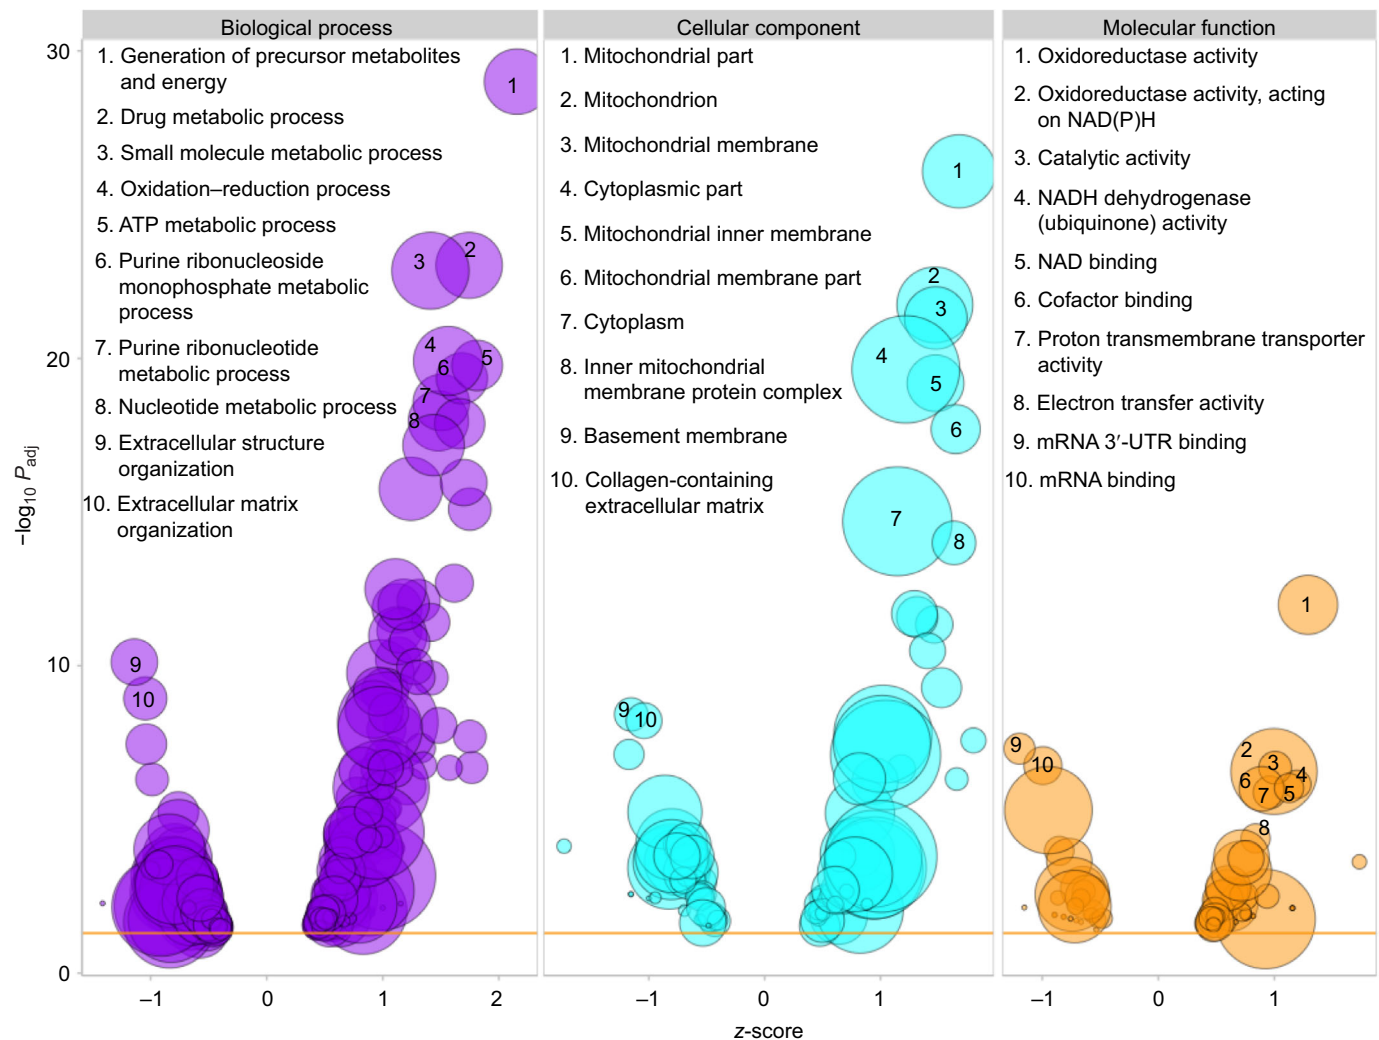

**Fig. 5. Enriched GO terms for the main effect of life stage and irrespective of acclimation temperature.** Data are plotted as the inverse log of the adjusted  $P$ -value versus  $z$ -score. Positive and negative  $z$ -scores indicate GO term enrichment for proteins that increase or decrease in abundance from hatchling to adult, respectively. Bubble size corresponds to the number of DA proteins represented in the GO term. The top 8 up-regulated and top 2 down-regulated GO terms are listed for 'biological process' (purple), 'cellular component' (blue) and 'molecular function' (orange).

must result from post-translational modifications rather than changes in the abundance of most proteins themselves. Second, given the pivotal role of the heart in circulating metabolic fuel and waste, it is perhaps not surprising that painted turtles prioritize the growth and development of the heart even under environmental conditions that may impede heart function. Finally, given the stark differences in overwintering strategies between hatchling and adult painted turtles, and knowing that heart function continues in both scenarios, the ontogenic changes in the cardiac proteome may be a determining factor in preventing hatchlings from spending the winter months submerged in anoxic water. More plainly, development is likely a more powerful driver of anoxia tolerance than any temperature induction.

#### Ontogenic changes to the cardiac proteome

There was an overwhelming effect of developmental stage on steady-state protein expression in the turtle heart, with as much as 30% of the total identified proteins changing in relative proportion between hatchling and adult hearts. Broadly, these changes involved a down-regulation of proteins supporting high-level GO terms related to cell organization and mRNA processing,

and up-regulation of proteins associated with energy metabolism, particularly with respect to mitochondrial form and function. These findings are in line with recent characterizations of the cardiac proteome of American alligators (*Alligator mississippiensis*), where steady-state protein expression in the heart ventricles of late-stage embryos indicated substantial investment in protein synthesis and cellular organization that was not evident in 2 year old juveniles (Alderman et al., 2019, 2020). Combined with the present study, these results emphasize that development of a complex organism is limited by the circulatory system. Thus, protecting a rigid cardiac developmental programme ensures that the growth and organization of the heart muscle parallels somatic growth such that increasing peripheral demands from the circulatory system are fulfilled by the capacity of the pump driving the system.

Transthyretin (TTR) was among the most down-regulated proteins associated with maturation in the present study, as was also the case in alligators (Alderman et al., 2020). TTR is a retinol and thyroid hormone carrier protein that is synthesized and secreted by the liver and choroid plexus, and so its repeated detection in the reptilian cardiac proteome is curious. A plausible explanation is that the TTR originated from blood trapped within the spongy

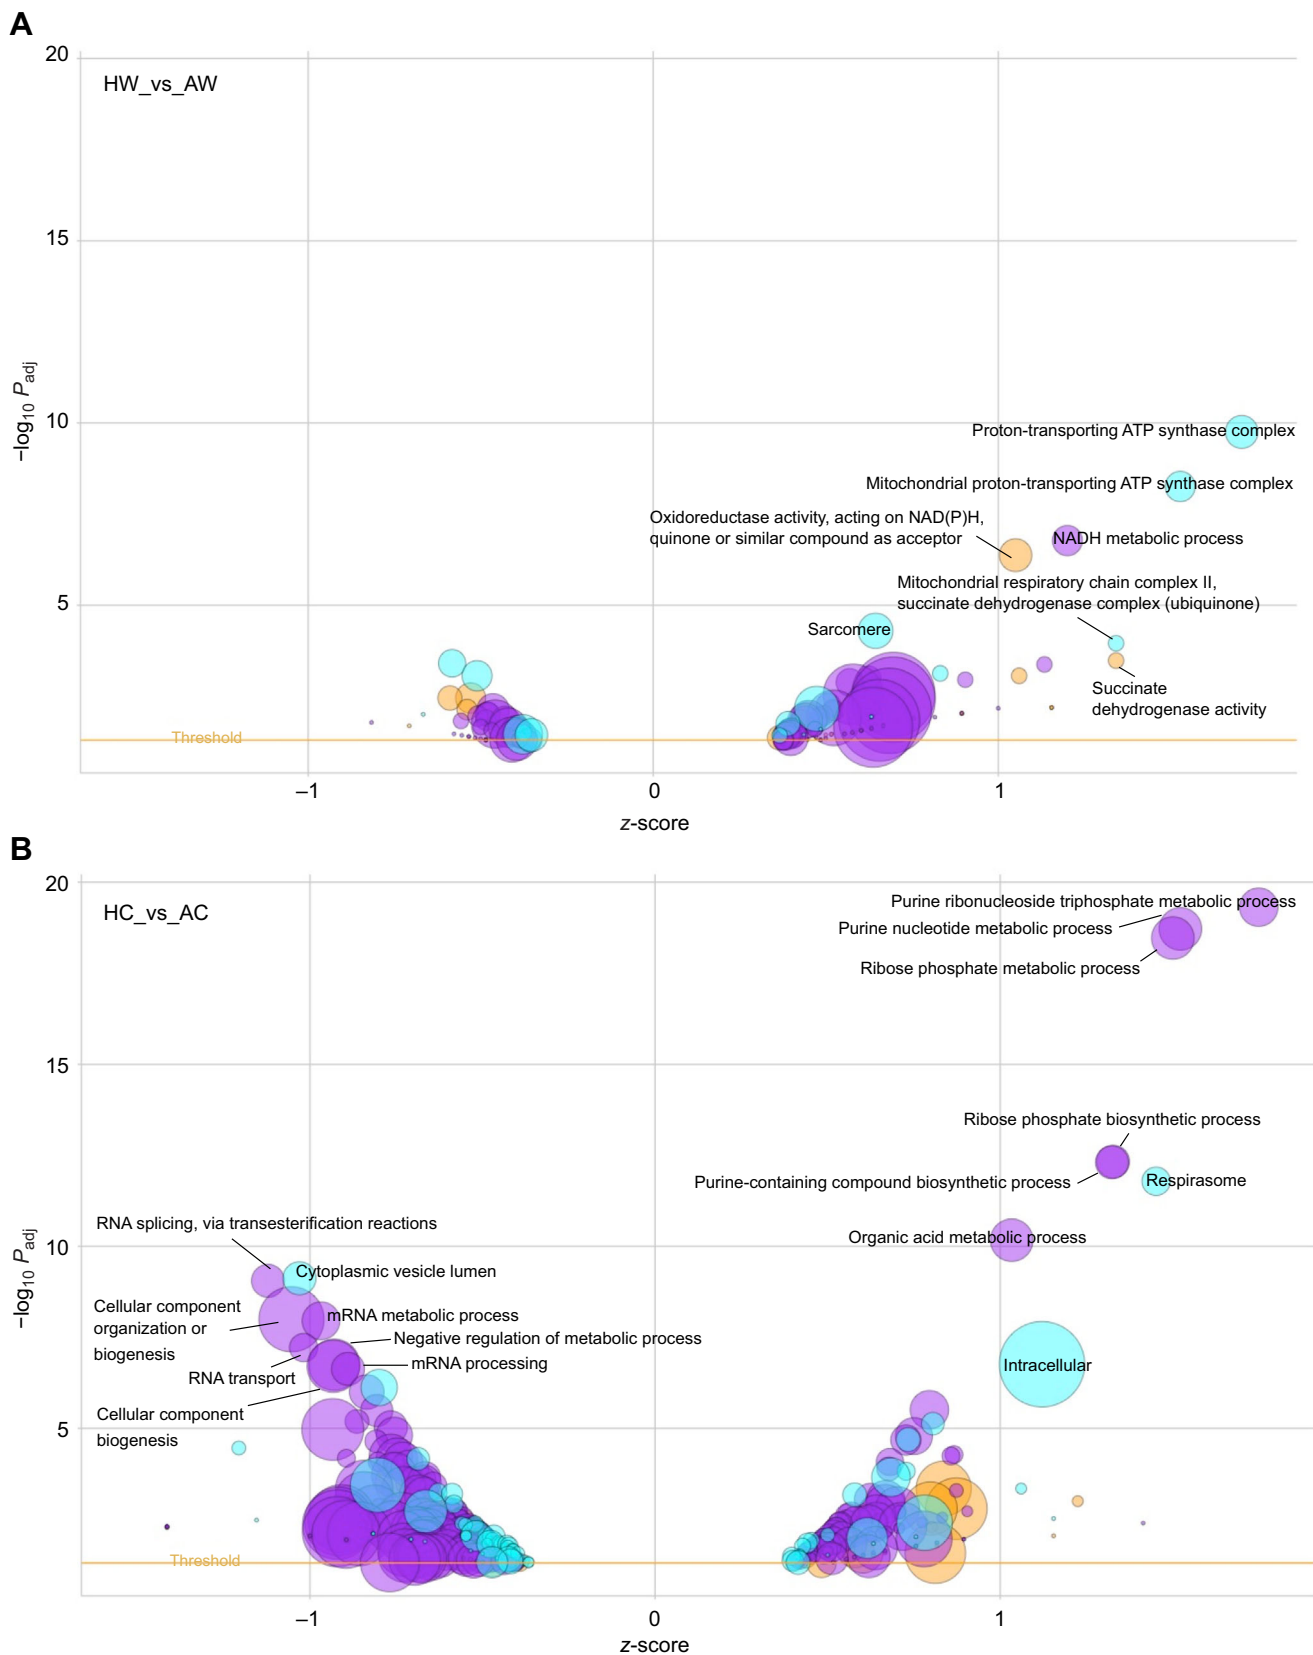

**Fig. 6. Enriched GO terms for the stage  $\times$  temperature interaction that are unique from a main effect of life stage.** Data for (A) warm-acclimated hatchlings relative to adults (HW\_vs\_AW) and (B) cold-acclimated hatchlings relative to adults (HC\_vs\_AC) are plotted as the inverse log of the adjusted  $P$ -value versus  $z$ -score. Positive and negative  $z$ -scores indicate GO term enrichment for proteins that increase or decrease in abundance from hatchling to adult, respectively. Bubble size corresponds to the number of DA proteins represented in the GO term. Bubble colour corresponds to the primary GO terms biological process (purple), cellular component (blue) and molecular function (orange). A selection of the top up-regulated and down-regulated GO terms is labelled.



ventricular myocardium, as other blood proteins (e.g. haemoglobin subunits) were also identified. While the observed age-related decline in TTR abundance is likely not relevant to cardiac maturation, it is consistent with a pronounced ontogenic decrease in circulating TTR across a variety of vertebrate taxa and underscores the importance of thyroid hormones in early life stages (Richardson et al., 2005).

Maturation of the turtle heart included notable investment in proteins involved in muscle energetics, including a concerted investment in ETS component proteins, which would provide an increased capacity for oxidative phosphorylation in adult hearts. Interestingly, elements of the sarcomere were not, in general, proportionally different between life stages, suggesting that the relative number of contractile units does not increase with age in these animals. Therefore, the increased capacity for ATP synthesis as the heart matures would support and sustain faster crossbridge cycling. Myoglobin, a haeme protein synthesized by muscle cells, also increased with age in the turtle heart. This would allow the heart to sustain aerobic respiration longer when breath-holding by maintaining a steep oxygen diffusion gradient into the cardiomyocyte and providing a greater capacity for cellular oxygen storage. Oxygen-independent energy pathways were also up-regulated with age in the turtle heart. For example, a life stage-related increase in lactate dehydrogenase A (LDHA) would help defend glycolytic flux rates under oxygen-limiting conditions. Other glycolytic enzymes (e.g. fructose biphosphate aldolase C, ALDOC; hexokinase 1, HK1) and creatine kinase M-type (CKM) were also elevated in adult relative to hatchling ventricles. Given that glycolysis is critical for ATP supply during anoxia, it is surprising that the brains of crucian carp and painted turtles reduced one or more of LDH, ALDOC, HK1 and CKM within 24 h of anoxia (Smith et al., 2009, 2015). In carp, LDH protein levels begin to recover towards normoxic levels after 7 days of continuous anoxia (Smith et al., 2009), and so the initial drop in the abundance of glycolytic enzymes may be a transient effect of a non-targeted reduction in protein synthesis. Combined, these results suggest that maturation of the turtle heart effectively augments the metabolic scope of cardiomyocytes to support continued cardiac function through daily and seasonal activity. Reciprocally, reduced myoglobin and capacity for aerobic ATP synthesis in hatchling cardiomyocytes, along with a lower haematocrit relative to adults (Fanter et al., 2020), would require that hatchlings switch to anaerobic metabolism sooner and could explain the greater accumulation and longer recovery time for plasma lactate in hatchlings relative to adults under experimental anoxia (Fanter et al., 2020).

### Life stage-specific responses to cold acclimation

Cold acclimation is recognized for improving anoxia tolerance in turtles and other hypoxia-tolerant species (Boutilier, 2001; Cox and Gillis, 2020; Hochachka, 1986). At the same time, an ontogenic threshold for anoxia tolerance likely exists, as adults survive much longer in anoxia than do hatchling turtles (Reese et al., 2004). The results of the present study highlight changes in cardiac protein expression that are likely to help generate the more anoxia-tolerant phenotype of cold-acclimated adult turtles relative to hatchlings. These changes include reduced ribosomal protein expression, alterations in component proteins of the ETS, and increased abundance of carbonic anhydrase, which would facilitate regulation of translational processes, mitochondrial respiration, intracellular pH and ROS production.

A key strategy for surviving anoxia is to reduce energy demand by entering a hypometabolic state (Jackson, 1968; Jackson and

Schmidt-Nielsen, 1966). In cardiac tissue, the metabolic costs associated with mechanical work claim the majority of the cellular energy budget, and thus the large reductions in heart rate and contractility are crucial to sustaining cardiac function during anoxia (Stecyk et al., 2008). Nevertheless, other cost-saving measures, including translational arrest, are likely important for long-term survival. Cellular and mitochondrial protein synthesis (Bailey and Driedzic, 1996) as well as total ventricular RNA content (Bailey and Driedzic, 1996; Keenan et al., 2015) were reduced in adult turtle cardiomyocytes within hours of anoxia exposure, and a sweeping reduction in transcripts for ribosomal proteins occurred following 20 days of anoxia exposure in cold-acclimated adult turtle hearts (Fanter et al., 2020). Conversely, cardiac protein synthesis appeared to continue unperturbed during 20 h of anoxia at 6°C in hatchling red-eared slider turtle hearts (Brooks and Storey, 1993), and transcription of ribosomal protein genes was elevated after 20 days of anoxia exposure in cold-acclimated hatchling painted turtle hearts relative to normoxia controls (Fanter et al., 2020). The results of the present study showed that cold acclimation reduced the abundance of three 40S ribosomal proteins in adult relative to hatchling hearts, and two 60S ribosomal proteins were elevated in cold-acclimated hatchling hearts to adult hearts. While these proteins represent a small portion of eukaryotic ribosomes, the changes are consistent with metabolic suppression via translational arrest (Bailey and Driedzic, 1996; Land and Hochachka, 1994; Land et al., 1993). This suggests that the cellular energy savings that come from reducing protein synthesis may already be at play during cold acclimation and prior to the onset of anoxia, and that the absence of this response in the hatchling heart may therefore contribute to the lower anoxia tolerance at this life stage.

An interaction between life stage and acclimation temperature was observed for several ETS components, ATP synthase and cytochrome *c*; however, the responses were asymmetrical and complex specific. For example, several Complex I component proteins (NDUFA5, NDUFA12, NDUFB9) were oppositely affected by cold acclimation in hatchling and adult turtle hearts. These findings are interesting to consider from the perspective of impending oxygen deprivation in adult but not hatchling turtles. For hatchlings, oxygen supply is unlikely to become limiting in their terrestrial overwintering environment, and so oxidative phosphorylation could continue as the primary supplier of ATP. Therefore, any cold-induced changes to components of the ETS may serve to compensate for the stabilizing effect of reduced temperature on protein structure and support the continued activity of the ETS at low temperature. Notably, hatchlings appear to switch reliance from COX5 to COX6 during cold acclimation, an effect not observed in adults. As cytochrome *c* oxidase (Complex IV) employs molecular oxygen as the final electron acceptor in the ETS, a hatchling-specific response to this complex supports its sustained dependency on oxygen during winter. For adult turtles, observed changes in ETS component proteins induced by cold acclimation may play a role in the metabolic preparations that enhance anoxia survival at low temperature. For example, the adult-specific decrease in several component proteins of Complexes II, III and V with cold acclimation would reduce the overall aerobic capacity of the heart and may contribute, at least in part, to the observed reduction in respiration rate of isolated mitochondria (Bundgaard et al., 2019; Galli et al., 2013) and the lower cellular ATP content (Stecyk et al., 2009) of cold-acclimated adult turtles.

For adult turtles, the temporal variation in temperature and oxygen availability through the winter season mean that not only do cold temperatures precede anoxia but also they persist as lake surfaces

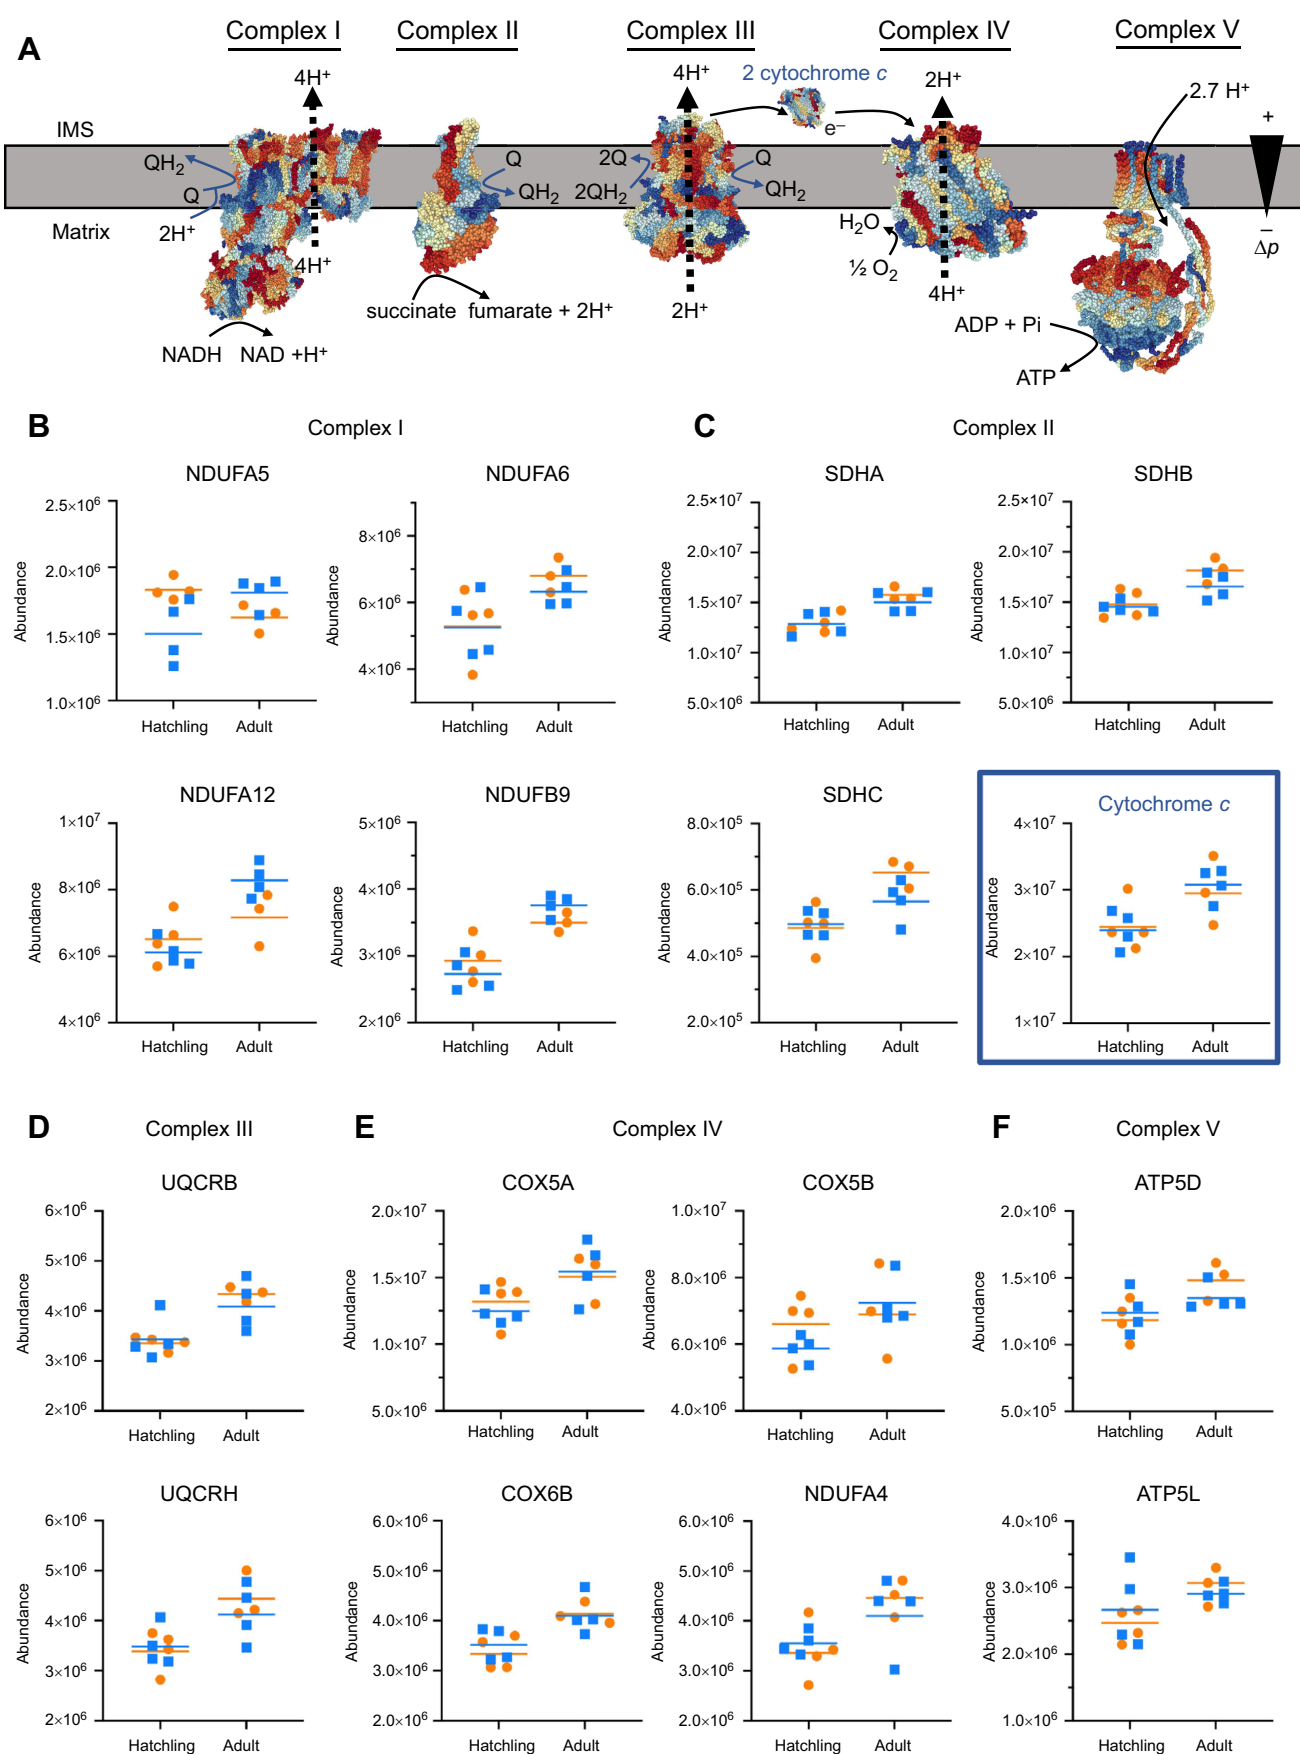

Fig. 7. See next page for legend.

**Fig. 7. Differentially abundant proteins for the stage×temperature interaction that are components or accessories of the electron transport system.**

(A) Schematic diagram of the respiratory chain, modified from Letts and Sazanov (2017) using structures from the RCSB Protein Data Bank (Complex I: Fiedorczuk et al., 2016; Complex II: Sun et al., 2005; Complex III: Gao et al., 2003; Complex IV: Yano et al., 2016; Complex V: Zhou et al., 2015; and cytochrome c: Shimada et al., 2017).  $\Delta p$  indicates the proton motive force, and the intermembrane space (IMS) is oriented up. Complex-specific protein abundance is plotted for individual turtles for warm-acclimated (orange) and cold-acclimated (blue) hatchlings and adults, with geometric mean marked with a coloured line for each stage×temperature variable ( $n=4$ , except warm-acclimated adult  $n=3$ ). Data are grouped by component proteins for Complex I (B), Complex II (C), Complex III (D), Complex IV (E) and Complex V (F), and cytochrome c is outlined in blue. ATP5D, ATP synthase subunit delta; ATP5L, ATP synthase subunit g; COX5A and COX5B, cytochrome c oxidase subunit 5A and 5B; COX6B, cytochrome c oxidase subunit 6B1; NDUFA4, cytochrome c oxidase subunit NDUFA4; NDUFA5, NADH dehydrogenase (ubiquinone) 1 alpha subcomplex subunit 5; NDUFA6, NADH dehydrogenase (ubiquinone) 1 alpha subcomplex subunit 6; NDUFA12, NADH dehydrogenase (ubiquinone) 1 alpha subcomplex subunit 12; NDUF9, NADH dehydrogenase (ubiquinone) 1 beta subcomplex subunit 9; Q, ubiquinone; QH<sub>2</sub>, ubiquinol; SDHA, succinate dehydrogenase (ubiquinone) flavoprotein subunit; SDHB, succinate dehydrogenase (ubiquinone) iron-sulfur subunit; SDHC, succinate dehydrogenase cytochrome *b*<sub>560</sub> subunit; UQCRB and UQCRH, cytochrome *b*-c<sub>1</sub> complex subunit 7 and 6.

thaw and atmospheric oxygen becomes accessible again. It is interesting, therefore, to consider the cardiac proteome of cold-acclimated adults with respect to how these changes may help to limit tissue damage upon reoxygenation. In mammals, reoxygenation after ischaemia drives a reversal of electron transfer as a consequence of ADP depletion and succinate accumulation during anoxia, leading to overproduction of ROS and triggering apoptosis (Chouchani et al., 2014; Murphy, 2009). Specifically, Complex V is unable to dissipate the proton motive force when oxygen returns to the system without an adequate supply of adenine nucleotides, forcing electron transfer backwards from Complex II to Complex I and generating superoxide (Chouchani et al., 2014, 2016). Yet, despite months in anoxic conditions, the adult turtle is able to avoid tissue damage upon reoxygenation, suggesting a highly effective ROS management strategy. High constitutive levels of antioxidant enzymes may be a factor in this strategy (Baker et al., 2007; Willmore and Storey, 1997a, b; but see Bundgaard et al., 2020), and the recently described peroxidase activity of myoglobin (Mannino et al., 2019) coupled with the abundance of this protein in the turtle heart (present study) supports a role for myoglobin in antioxidant defence of the turtle heart. In addition to managing ROS damage, the turtle heart also minimizes ROS production upon reoxygenation by limiting succinate accumulation (Buck, 2000; Bundgaard et al., 2018) and stabilizing ADP levels (Bundgaard et al., 2019; Galli et al., 2013) during the anoxic interval. The results of the present study suggest that targeted protein abundance changes during cold acclimation may be a contributing mechanism in limiting ROS production. In adult but not hatchling turtle hearts, cold acclimation induced a down-regulation of several Complex II component proteins (SDHA, SDHB, SDHC) which would help to slow succinate accumulation in anoxia. At the same time, GO terms related to purine metabolic processes were the top enriched pathways in cold-acclimated adults, suggesting enhanced efforts to regulate adenine nucleotide levels to maintain a balance in intracellular ATP/ADP.

## Conclusions

Physiological investigations of painted turtles and other anoxia-tolerant vertebrates have resulted in a comprehensive and integrative

understanding of how animals can survive without oxygen. Onto this long history of research, the present study maps a holistic perspective of protein-level changes in the turtle heart that underpin a rigid developmental programme and a temperature-induced phenotype ultimately capable of withstanding months of anoxia. Importantly, the results of this study highlight the crucial importance of ontogeny in bestowing anoxia tolerance in turtles, and so future efforts to better define the functional properties of the hatchling turtle heart relative to the adult heart may yield new insights into cardiac function during and following anoxia exposure.

## Acknowledgements

The authors thank Dr C. Fanter (Saint Louis University) for assistance conducting the overwintering experiment, and Dr K. Cottenie (University of Guelph) for help writing the R script.

## Competing interests

The authors declare no competing or financial interests.

## Author contributions

Conceptualization: C.L.R., D.E.W.; Methodology: S.L.A., C.L.R.; Formal analysis: S.L.A., O.M.N.B.; Investigation: C.L.R., D.E.W.; Resources: T.E.G., D.E.W.; Data curation: S.L.A., O.M.N.B.; Writing - original draft: S.L.A.; Writing - review & editing: C.L.R., T.E.G., D.E.W.; Visualization: S.L.A., O.M.N.B.; Supervision: S.L.A., D.E.W.; Project administration: D.E.W.; Funding acquisition: D.E.W.

## Funding

S.L.A. and T.E.G. are supported by Natural Sciences and Engineering Research Council of Canada (NSERC) Discovery Grants. O.M.N.B. received a Morwick Summer Research Assistantship (University of Guelph) and a Mitacs Undergraduate Research Training Award. This study was funded by a National Science Foundation CAREER grant (award 1253939) to D.E.W.

## Data availability

Data are available from ProteomeXchange PXD023534.

## References

- Adolph, E. F. (1969). Regulations during survival without oxygen in infant mammals. *Respir. Physiol.* **7**, 356–368. doi:10.1016/0034-5687(69)90019-X
- Alderman, S. L., Crossley, D. A., Else, R. M. and Gillis, T. E. (2019). Hypoxia-induced reprogramming of the cardiac phenotype in American alligators (*Alligator mississippiensis*) revealed by quantitative proteomics. *Sci. Rep.* **9**, 8592. doi:10.1038/s41598-019-45023-3
- Alderman, S. L., Crossley, D. A., Else, R. M. and Gillis, T. E. (2020). Growing up gator: a proteomic perspective on cardiac maturation in an oviparous reptile, the American alligator (*Alligator mississippiensis*). *J. Comp. Physiol. B* **190**, 243–252. doi:10.1007/s00360-020-01257-6
- Bailey, J. R. and Driedzic, W. R. (1996). Decreased total ventricular and mitochondrial protein synthesis during extended anoxia in turtle heart. *Am. J. Physiol. Regul. Integr. Comp. Physiol.* **271**, R1660–R1667. doi:10.1152/ajpregu.1996.271.6.R1660
- Baker, P. J., Costanzo, J. P. and Lee, R. E. (2007). Oxidative stress and antioxidant capacity of a terrestrially hibernating hatchling turtle. *J. Comp. Physiol. B Biochem. Syst. Environ. Physiol.* **177**, 875–883. doi:10.1007/s00360-007-0185-0
- Bickler, P. E. and Buck, L. T. (2007). Hypoxia tolerance in reptiles, amphibians, and fishes: Life with variable oxygen availability. *Annu. Rev. Physiol.* **69**, 145–170. doi:10.1146/annurev.physiol.69.031905.162529
- Boutillier, R. G. (2001). Mechanisms of cell survival in hypoxia and hypothermia. *J. Exp. Biol.* **204**, 3171–3181. doi:10.1242/jeb.204.18.3171
- Brooks, S. P. and Storey, K. B. (1993). De novo protein synthesis and protein phosphorylation during anoxia and recovery in the red-eared turtle. *Am. J. Physiol. Regul. Integr. Comp. Physiol.* **265**, R1380–R1386. doi:10.1152/ajpregu.1993.265.6.R1380
- Buck, L. T. (2000). Succinate and alanine as anaerobic end-products in the diving turtle (*Chrysemys picta bellii*). *Comp. Biochem. Physiol. B Biochem. Mol. Biol.* **126**, 409–413. doi:10.1016/S0305-0491(00)00215-7
- Bundgaard, A., James, A. M., Joyce, W., Murphy, M. P. and Fago, A. (2018). Suppression of reactive oxygen species generation in heart mitochondria from anoxic turtles: the role of complex I S-nitrosation. *J. Exp. Biol.* **221**, jeb174391. doi:10.1242/jeb.174391
- Bundgaard, A., Qvortrup, K., Rasmussen, L. J. and Fago, A. (2019). Turtles maintain mitochondrial integrity but reduce mitochondrial respiratory capacity in



- the heart after cold acclimation and anoxia. *J. Exp. Biol.* **222**, 1–9. doi:10.1242/jeb.200410
- Bundgaard, A., Ruhr, I. M., Fago, A. and Galli, G. L. J. (2020). Metabolic adaptations to anoxia and reoxygenation: New lessons from freshwater turtles and crucian carp. *Curr. Opin. Endocr. Metab. Res.* **11**, 55–64. doi:10.1016/j.coemr.2020.01.002
- Chouchani, E. T., Pell, V. R., Gaude, E., Aksentijević, D., Sundier, S. Y., Robb, E. L., Logan, A., Nadtochiy, S. M., Ord, E. N. J., Smith, A. C. et al. (2014). Ischaemic accumulation of succinate controls reperfusion injury through mitochondrial ROS. *Nature* **515**, 431–435. doi:10.1038/nature13909
- Chouchani, E. T., Pell, V. R., James, A. M., Work, L. M., Saeb-Parsy, K., Frezza, C., Krieg, T., Murphy, M. P. (2016). A unifying mechanism for mitochondrial superoxide production during ischemia-reperfusion injury. *Cell Metab.* **23**, 254–263. doi:10.1016/j.cmet.2015.12.009
- Cox, G. K. and Gillis, T. E. (2020). Surviving anoxia: the maintenance of energy production and tissue integrity during anoxia and reoxygenation. *J. Exp. Biol.* **223**, jeb207613.
- Dindia, L. A., Alderman, S. L. and Gillis, T. E. (2017). Novel insights into cardiac remodelling revealed by proteomic analysis of the trout heart during exercise training. *J. Proteomics* **161**, 38–46. doi:10.1016/j.jprot.2017.03.023
- Fanter, C. E., Campbell, K. S. and Warren, D. E. (2017). The effects of pH and Pi on tension and Ca<sup>2+</sup> sensitivity of ventricular myofilaments from the anoxia-tolerant painted turtle. *J. Exp. Biol.* **220**, 4234–4241. doi:10.1242/jeb.164137
- Fanter, C. E., Lin, Z., Keenan, S. W., Janzen, F. J., Mitchell, T. S. and Warren, D. E. (2020). Development-specific transcriptomic profiling suggests new mechanisms for anoxic survival in the ventricle of overwintering turtles. *J. Exp. Biol.* **223**, jeb213918. doi:10.1242/jeb.213918
- Fiedorczuk, K., Letts, J. A., Degliesposti, G., Kaszuba, K., Skehel, M. and Sazanov, L. A. (2016). Atomic structure of the entire mammalian mitochondrial complex I. *Nature* **538**, 406–410. doi:10.1038/nature19794
- Fraser, K. P., Houlihan, D. F., Lutz, P. L., Leone-Kabler, S., Manuel, L. and Brechin, J. G. (2001). Complete suppression of protein synthesis during anoxia with no post-anoxia protein synthesis debt in the red-eared slider turtle *Trachemys scripta elegans*. *J. Exp. Biol.* **204**, 4353–4360. doi:10.1242/jeb.204.24.4353
- Galli, G. L. J., Lau, G. Y. and Richards, J. G. (2013). Beating oxygen: chronic anoxia exposure reduces mitochondrial F1FO-ATPase activity in turtle (*Trachemys scripta*) heart. *J. Exp. Biol.* **216**, 3283–3293. doi:10.1242/jeb.087155
- Gao, X., Wen, X., Esser, L., Quinn, B., Yu, L., Yu, C. A. and Xia, D. (2003). Structural basis for the quinone reduction in the bc1 complex: A comparative analysis of crystal structures of mitochondrial cytochrome bc1 with bound substrate and inhibitors at the Qi site. *Biochemistry* **42**, 9067–9080. doi:10.1021/bi0341814
- Gomez, C. R. and Richards, J. G. (2018). Mitochondrial responses to anoxia exposure in red eared sliders (*Trachemys scripta*). *Comp. Biochem. Physiol. B Biochem. Mol. Biol.* **224**, 71–78. doi:10.1016/j.cbpb.2018.01.005
- Herbert, C. V. and Jackson, D. (1985a). Temperature effects on the responses to prolonged submergence in the turtle *Chrysemys picta bellii*. I. Blood acid-base and ionic changes during and following anoxic submergence. *Physiol. Zool.* **58**, 655–669. doi:10.1086/physzool.58.6.30156070
- Herbert, C. V. and Jackson, D. C. (1985b). Temperature effects on the responses to prolonged submergence in the turtle *Chrysemys picta bellii*. II. Metabolic rate, blood acid-base and ionic changes, and cardiovascular function in aerated and anoxic water. *Physiol. Zool.* **58**, 670–681. doi:10.1086/physzool.58.6.30156071
- Hochachka, P. W. (1986). Defense strategies against hypoxia and hypothermia. *Science* **231**, 234–241. doi:10.1126/science.2417316
- Hochachka, P. W., Buck, L. T., Doll, C. J. and Land, S. C. (1996). Unifying theory of hypoxia tolerance: molecular/metabolic defense and rescue mechanisms for surviving oxygen lack. *Proc. Natl Acad. Sci. USA* **93**, 9493–9498. doi:10.1073/pnas.93.18.9493
- Jackson, D. C. (1968). Metabolic depression and oxygen depletion in the diving turtle. *J. Appl. Physiol.* **24**, 503–509. doi:10.1152/jappl.1968.24.4.503
- Jackson, D. C. (2000). How a turtle's shell helps it survive prolonged anoxic acidosis. *News Physiol. Sci.* **15**, 181–185.
- Jackson, D. C. (2002). Hibernating without oxygen: the painted turtle. *J. Physiol. Lond.* **543**, 731–737. doi:10.1113/jphysiol.2002.024729
- Jackson, D. C. and Schmidt-Nielsen, K. (1966). Heat production during diving in the fresh water turtle, *Pseudemys scripta*. *J. Cell. Physiol.* **67**, 225–231. doi:10.1002/jcp.1040670204
- Jackson, D. C. and Ultsch, G. R. (2010). Physiology of hibernation under the ice by turtles and frogs. *J. Exp. Zool. A Ecol. Genet. Physiol.* **313A**, 311–327. doi:10.1002/jez.603
- Keenan, S. W., Hill, C. A., Kandoth, C., Buck, L. T. and Warren, D. E. (2015). Transcriptomic responses of the heart and brain to anoxia in the western painted turtle. *PLoS ONE* **10**, e0131669.
- Land, S. C. and Hochachka, P. W. (1994). Protein turnover during metabolic arrest in turtle hepatocytes: role and energy dependence of proteolysis. *Am. J. Physiol. Cell Physiol.* **266**, C1028–C1036. doi:10.1152/ajpcell.1994.266.4.C1028
- Land, S. C., Buck, L. T. and Hochachka, P. W. (1993). Response of protein synthesis to anoxia and recovery in anoxia-tolerant hepatocytes. *Am. J. Physiol. Regul. Integr. Comp. Physiol.* **265**, R41–R48. doi:10.1152/ajpregu.1993.265.1.R41
- Letts, J. A. and Sazanov, L. A. (2017). Clarifying the supercomplex: the higher-order organization of the mitochondrial electron transport chain. *Nat. Struct. Mol. Biol.* **24**, 800–808. doi:10.1038/nsmb.3460
- Mahoney, D. W., Therneau, T. M., Heppelmann, C. J., Higgins, L., Benson, L. M., Zenka, R. M., Jagtap, P., Nelsestuen, G. L., Bergen, H. R. and Oberg, A. L. (2011). Relative quantification: characterisation of bias, variability and fold changes in mass spectrometry data from iTRAQ-labelled peptides. *J. Proteome Res.* **10**, 4325–4333. doi:10.1021/pr2001308
- Mannino, M. H., Patel, R. S., Eccardt, A. M., Perez Magnelli, R. A., Robinson, C. L. C., Janowiak, B. E., Warren, D. E. and Fisher, J. S. (2019). Myoglobin as a versatile peroxidase: Implications for a more important role for vertebrate striated muscle in antioxidant defense. *Comp. Biochem. Physiol. B Biochem. Mol. Biol.* **234**, 9–17. doi:10.1016/j.cbpb.2019.04.005
- Murphy, M. P. (2009). How mitochondria produce reactive oxygen species. *Biochem. J.* **417**, 1–13. doi:10.1042/BJ20081386
- Odegard, D. T., Sonnenfelt, M. A., Bledsoe, J. G., Keenan, S. W., Hill, C. A. and Warren, D. E. (2018). Changes in the material properties of the shell during simulated aquatic hibernation in the anoxia-tolerant painted turtle. *J. Exp. Biol.* **221**, jeb176990. doi:10.1242/jeb.176990
- Overgaard, J., Gesser, H. and Wang, T. (2007). Tribute to P. L. Lutz: Cardiac performance and cardiovascular regulation during anoxia/hypoxia in freshwater turtles. *J. Exp. Biol.* **210**, 1687–1699. doi:10.1242/jeb.001925
- Pamenter, M. E., Gomez, C. R., Richards, J. G. and Milsom, W. K. (2016). Mitochondrial responses to prolonged anoxia in brain of red-eared slider turtles. *Biol. Lett.* **12**, 20150797. doi:10.1098/rsbl.2015.0797
- Pascovici, D., Handler, D. C. L., Wu, J. X. and Haynes, P. A. (2016). Multiple testing corrections in quantitative proteomics: A useful but blunt tool. *Proteomics* **16**, 2448–2453. doi:10.1002/pmic.201600044
- Reese, S. A., Ultsch, G. R. and Jackson, D. C. (2004). Lactate accumulation, glycogen depletion, and shell composition of hatchling turtles during simulated aquatic hibernation. *J. Exp. Biol.* **207**, 2889–2895. doi:10.1242/jeb.01124
- Richardson, S. J., Monk, J. A., Shepherdley, C. A., Ebbesson, L. O. E., Sin, F., Power, D. M., Frappell, P. B., Köhrle, J. and Renfree, M. B. (2005). Developmentally regulated thyroid hormone distributor proteins in marsupials, a reptile, and fish. *Am. J. Physiol. Regul. Integr. Comp. Physiol.* **288**, 1264–1272. doi:10.1152/ajpregu.00793.2004
- Saw, Y. O., Salim, M., Noirel, J., Evans, C., Rehman, I. and Wright, P. C. (2009). ITRAQ underestimation in simple and complex mixtures: "The good, the bad and the ugly". *J. Proteome Res.* **8**, 5347–5355. doi:10.1021/pr900634c
- Shimada, S., Shinzawa-Itoh, K., Baba, J., Aoe, S., Shimada, A., Yamashita, E., Kang, J., Tateno, M., Yoshikawa, S. and Tsukihara, T. (2017). Complex structure of cytochrome c–cytochrome c oxidase reveals a novel protein–protein interaction mode. *EMBO J.* **36**, 291–300. doi:10.15252/emboj.201695021
- Smith, R. W., Cash, P., Ellefsen, S. and Nilsson, G. E. (2009). Proteomic changes in the crucian carp brain during exposure to anoxia. *Proteomics* **9**, 2217–2229. doi:10.1002/pmic.200800662
- Smith, R. W., Cash, P., Hogg, D. W. and Buck, L. T. (2015). Proteomic changes in the brain of the western painted turtle (*Chrysemys picta bellii*) during exposure to anoxia. *Proteomics* **15**, 1587–1597. doi:10.1002/pmic.201300229
- Stecyk, J. A. W., Galli, G. L., Shiels, H. A. and Farrell, A. P. (2008). Cardiac survival in anoxia-tolerant vertebrates: An electrophysiological perspective. *Comp. Biochem. Physiol. C Toxicol. Pharmacol.* **148**, 339–354. doi:10.1016/j.cbpc.2008.05.016
- Stecyk, J. A. W., Bock, C., Overgaard, J., Wang, T., Farrell, A. P. and Pörtner, H.-O. (2009). Correlation of cardiac performance with cellular energetic components in the oxygen-deprived turtle heart. *Am. J. Physiol. Regul. Integr. Comp. Physiol.* **297**, R756–R768. doi:10.1152/ajpregu.00102.2009
- Storey, K. B. (2004). Adventures in oxygen metabolism. *Comp. Biochem. Physiol. B Biochem. Mol. Biol.* **139**, 359–369. doi:10.1016/j.cbpc.2004.02.018
- St-Pierre, J., Brand, M. D. and Boutilier, R. G. (2000). The effect of metabolic depression on proton leak rate in mitochondria from hibernating frogs. *J. Exp. Biol.* **203**, 1469–1476. doi:10.1242/jeb.203.9.1469
- Stuart, J. A., Gillis, T. E. and Ballantyne, J. S. (1998). Compositional correlates of metabolic depression in the mitochondrial membranes of estivating snails. *Am. J. Physiol. Regul. Integr. Comp. Physiol.* **275**, R1977–R1982. doi:10.1152/ajpregu.1998.275.6.R1977
- Sun, F., Huo, X., Zhai, Y., Wang, A., Xu, J., Su, D., Bartlam, M. and Rao, Z. (2005). Crystal structure of mitochondrial respiratory membrane protein Complex II. *Cell* **121**, 1043–1057. doi:10.1016/j.cell.2005.05.025
- Walter, W., Sánchez-Cabo, F. and Ricote, M. (2015). GOplot: An R package for visually combining expression data with functional analysis. *Bioinformatics* **31**, 2912–2914. doi:10.1093/bioinformatics/btv300
- Warren, D. E. and Jackson, D. C. (2007). Effects of temperature on anoxic submergence: skeletal buffering, lactate distribution, and glycogen utilization in the turtle, *Trachemys scripta*. *Am. J. Physiol. Regul. Integr. Comp. Physiol.* **293**, R458–R467. doi:10.1152/ajpregu.00174.2006
- Willmore, W. G. and Storey, K. B. (1997a). Glutathione systems and anoxia tolerance in turtles. *Am. J. Physiol. Regul. Integr. Comp. Physiol.* **42**, R219–R225. doi:10.1152/ajpregu.1997.273.1.R219



- Willmore, W. G. and Storey, K. B.** (1997b). Antioxidant systems and anoxia tolerance in a freshwater turtle *Trachemys scripta elegans*. *Mol. Cell. Biochem.* **170**, 177-185. doi:10.1023/A:1006817806010
- Yano, N., Muramoto, K., Shimada, A., Takemura, S., Baba, J., Fujisawa, H., Mochizuki, M., Shinzawa-Itoh, K., Yamashita, E., Tsukihara, T. et al.** (2016). The  $Mg^{2+}$ -containing water cluster of mammalian cytochrome c oxidase collects four pumping proton equivalents in each catalytic cycle. *J. Biol. Chem.* **291**, 23882-23894. doi:10.1074/jbc.M115.711770
- Zhou, A., Rohou, A., Schep, D. G., Bason, J. V., Montgomery, M. G., Walker, J. E., Grigorieff, N. and Rubinstein, J. L.** (2015). Structure and conformational states of the bovine mitochondrial ATP synthase by cryo-EM. *eLife* **4**, e10180. doi:10.7554/eLife.10180
